# Supplementary material for: Analysis of Molecular Disordering Processes in the Phase Transition of Liquid Crystals Observed by Patterned-Illumination Time-Resolved Phase Microscopy
Source: MDPI journal article supplement (doi:10.3390/ma14195491), 2021-09-23
Supplement: s1 [file s1]

*Supporting Information*

Analysis of Molecular Disordering Processes in the Phase  
Transition of Liquid Crystals Observed by Patterned-illumination  
Time-resolved Phase Microscopy

Nozomi Sato<sup>1</sup>, Kenji Katayama<sup>1\*</sup>

<sup>1</sup> Department of Applied Chemistry, Chuo University, Tokyo 112-8551, Japan

\*Corresponding authors:

K. Katayama, Phone: +81-3-3817-1913, E-mail: kkata@kc.chuo-u.ac.jp

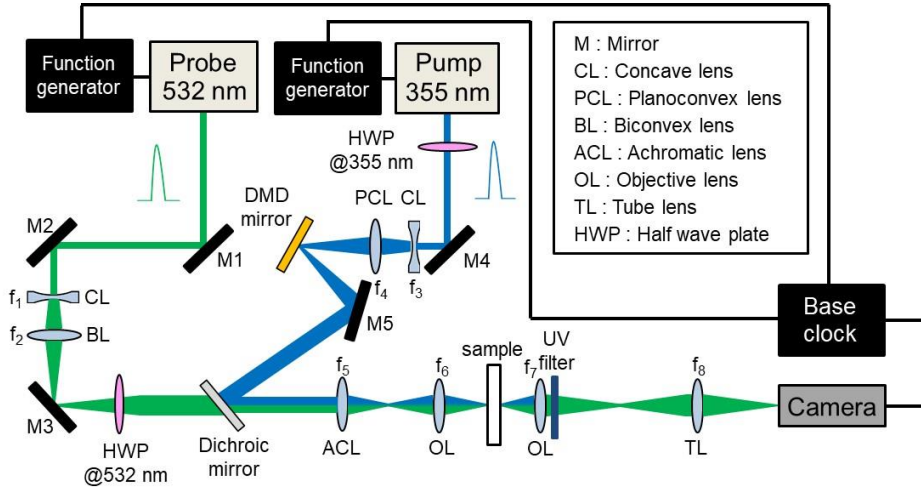

**Figure S1.** The schematic overview of the optical setup of time-resolved phase microscope is shown. A pump pulse was first reflected at a digital micromirror device (DMD) mirror with an arbitrary pattern. Another probe pulse was irradiated onto the sample. For the imaging purpose, an objective lens and a tube lens were used before the CMOS camera. For the pattern illumination, a DMD (Light Crafter 4500, Texas Instruments) was used. The pump light was reflected at the DMD mirror to change the intensity pattern same as the pattern on a computer. The image of the DMD mirror was relayed with a lens ( $f = 100$  mm) and an objective lens (LUCPLFLN20x, Olympus) to irradiate the same pattern reduced in size ( $1/14$ ) onto a sample. The pulsed illumination light was collimated with the pump light at the dichroic mirror and illuminated onto a sample. The transmitted light was imaged by an objective lens (LUCPLFLN20x, Olympus) and a tube lens (TTL180-A, Thorlabs). A CMOS camera (MV1-D1024E-160, Photon Focus) had a sensor area of  $10.9 \times 10.9$  mm ( $1024 \times 1024$  pixel), and the central region in the vertical direction ( $200 \times 1024$  pixel) was recorded to reduce the burden of the computer processing. The diameter of the irradiated area by the pump pulse was  $0.5$  mm. By varying the time delay between the pump and probe pulse, a sequence of images was stored into a computer. The time resolution was limited only by the pulse width of the pump and probe lights,  $5$  ns. The pump light was the third harmonics of a Nd:YAG pulse laser (pulse width:  $5$  ns, wavelength:  $355$  nm) (GAIA, Rayture Systems). The probe light was the second harmonics of an Nd:YAG pulse laser (pulse width:  $5$  ns, wavelength:  $532$  nm) (GAIA, Rayture Systems). The timing of these pulses was controlled by two function generators (WF1968, NF) triggered by a base clock (DF1906, NF). Each function generator controlled both the timing of the flash lamp and the Q-switch with a time resolution of  $100$  ps. The pump polarization and the LC director were matched by a half wave plate (WPH05M-355, Thorlabs). The probe polarization was switched by rotating a half wave plate (WPH05M-532, Thorlabs).  $\Delta n_e(t)$  was observed when the probe polarization was parallel to the LC director, and  $\Delta n_o(t)$  was measured with the probe polarization perpendicular to it. The pump light intensity was  $0.67$  mJ/pulse, and the probe light intensity was  $0.02$  mJ/pulse, respectively.

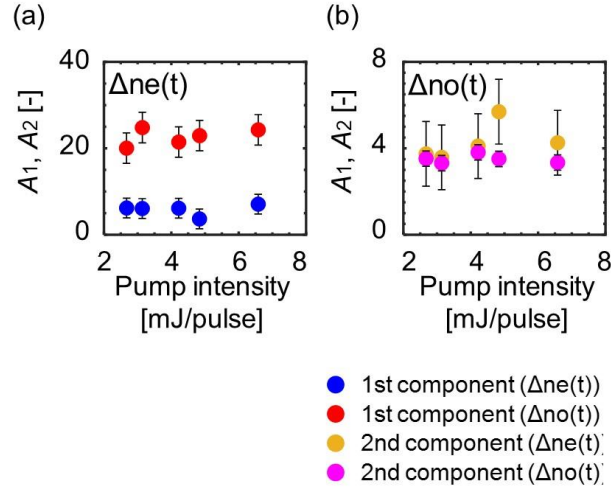

**Figure S2.** The adjusting parameters for (a)  $\Delta n_e(t)$  and (b)  $\Delta n_o(t)$  for MBBA are shown. The pump light intensities were 2.67, 3.14, 4.22, 4.84, and 6.58 mJ/pulse.

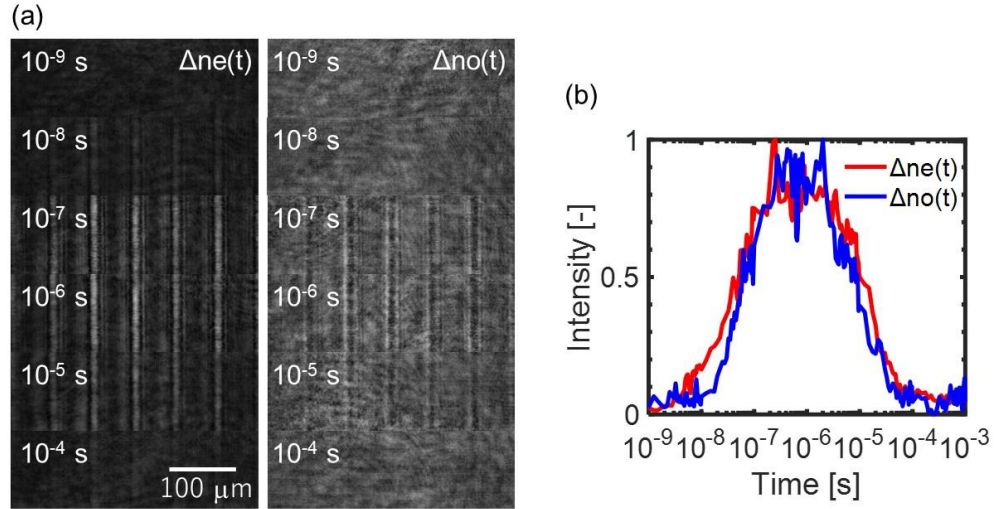

**Figure S3.** (a) The overall image sequences corresponding to  $\Delta n_e(t)$  and  $\Delta n_o(t)$  of 5CB doped with BHAB are shown. The pump intensity was 2.67 mJ/pulse. (b) The temporal changes of the amplitudes of the stripe contrast in the refractive index images are shown. The time axis is shown in a logarithmic timescale.

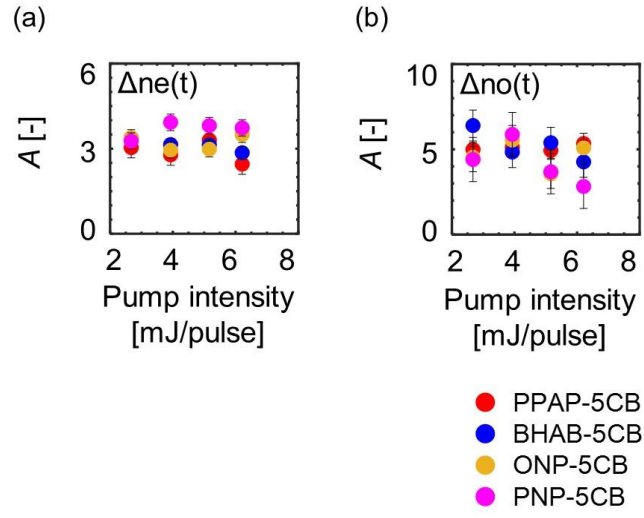

**Figure S4.** The adjusting parameters for (a)  $\Delta n_e(t)$  and (b)  $\Delta n_o(t)$  for the dye-doped LCs are shown. The pump light intensities were 2.67, 3.93, 5.16 and 6.21 mJ/pulse. The samples were 5CB doped with PPAP, BHAB, o-NP, and p-NP.
